# Supplementary material for: Histopathological Assessment of the Effect of Pregabalin Toxicity on Cerebrum and Cerebellum of Adult Albino Rats
Source: Research Square preprint supplement (doi:10.21203/rs.3.rs-149289/v1), 2021-01-21
Supplement: Supplementary file 1 [file 74bf5c31c070ab52ee01e004.docx]

**Histopathological assessment of the effect of Pregabalin toxicity on cerebrum and cerebellum of Adult Albino Rats**

Wael Abdo Hassan**1***, Shaimaa Ahmed Ali Shehata**2**, Ahmed Kamal ElBana**3**

1Department of Basic Sciences, College of Medicine, Suliman Al Rajhi University, KSA

2Department of Forensic Medicine and Clinical Toxicology, Faculty of Medicine, Suez Canal University, Egypt

3Department of Anatomy, faculty of Medicine, Al Azhar University, Egypt

*Correspondence: Department of Basic sciences, Sulaiman Al Rajhi University, College of Medicine, Al Bukairiyah 51941, PO Box 777, Kingdom of Saudi Arabia. Tel.00966-507091876. Fax : 00966163169090.E-mail: w.hassan@sr.edu.sa

**Supplementary information**

| Name | Purchased from |
| --- | --- |
| **Pregabalin:** Powder (75 & 150 mg, capsule) | Pfizer pharmaceutical company, Cairo, Egypt under the authority of PfizerInc.USA. |
| **Thiopental Na** Powder (500 mg, vial) | Epico, 10th of Ramadan city, Egypt. |
| **Hematoxylin dye** | El Nasr pharmaceutical company. El Qalyubia, Egypt |
| **Eosin dye** | El Nasr pharmaceutical company. El Qalyubia, Egypt |
| **Formalin** | El Gomhouria Company.Cairo, Egypt |
| **Paraffin wax** | El Gomhouria Company.Cairo, Egypt |
